# Supplementary material for: Heteroleptic platinum(ii) isocyanide complexes: convenient synthetic access, polymorphs, and vapoluminescence
Source: Royal Society of Chemistry journal article supplement (doi:10.1039/c4dt03820g), 2015-01-01
Supplement: c4dt03820g1.pdf [file c4dt03820g1.pdf]

Electronic Supporting Information for

**Heteroleptic Platinum(II) Isocyanide Complexes: Convenient Synthetic Access, Polymorphs, and Vapoluminescence**

Daron E. Janzen<sup>a</sup> and Kent R. Mann<sup>b</sup>

<sup>a</sup> St. Catherine University, Department of Chemistry and Biochemistry, 2004 Randolph Avenue, St. Paul, MN, USA.

<sup>b</sup> University of Minnesota, Twin Cities, Department of Chemistry, 207 Pleasant St. SE, Minneapolis, MN, USA.

|                                                                                   |    |
|-----------------------------------------------------------------------------------|----|
| X-ray Crystallographic Data Collection and Refinement (Table S1).....             | 2  |
| Bond lengths and Angles Summary (Table S2) .....                                  | 3  |
| Intermolecular Interactions in the Structure of <b>1</b> (Figure S1) .....        | 4  |
| Intermolecular Interactions in the Structure of <b>3</b> (Figure S2).....         | 5  |
| X-ray Powder Diffraction of <b>2</b> at rt, -150°C, and -190°C (Figure S3).....   | 6  |
| Comparison of ATR-IR Spectra of <b>1</b> and <b>4</b> (Figure S4).....            | 7  |
| Solid-state Emission Spectrum of a Film of <b>1</b> (Figure S5).....              | 8  |
| Solid-state Emission Spectrum of Crystalline <b>3</b> (Figure S6).....            | 9  |
| Solid-state Emission Spectra of <b>4</b> Exposed to Water Vapor (Figure S7) ..... | 10 |
| Simulated Mass Pickup of <b>4</b> by Water (Figure S8) .....                      | 11 |

**Table S1.** X-ray Crystallographic Data Collection and Refinement for (TBA)[Pt(CN)<sub>3</sub>(CNCH<sub>3</sub>)] (**1**), colorless (TBA)[Pt(CN)<sub>3</sub>(CN-*c*-C<sub>6</sub>H<sub>11</sub>)] (**2-c**), orange (TBA)[Pt(CN)<sub>3</sub>(CN-*c*-C<sub>6</sub>H<sub>11</sub>)] (**2-o**), (TBA)[Pt(CN)<sub>3</sub>(CN-*p*-(C<sub>2</sub>H<sub>5</sub>)-C<sub>6</sub>H<sub>4</sub>)] (**3**)

| Compound                                      | <b>1</b>                                          | <b>2-c</b>                                        | <b>2-o</b>                                        | <b>3</b>                                          |
|-----------------------------------------------|---------------------------------------------------|---------------------------------------------------|---------------------------------------------------|---------------------------------------------------|
| formula                                       | C <sub>21</sub> H <sub>39</sub> N <sub>5</sub> Pt | C <sub>26</sub> H <sub>47</sub> N <sub>5</sub> Pt | C <sub>26</sub> H <sub>47</sub> N <sub>5</sub> Pt | C <sub>28</sub> H <sub>45</sub> N <sub>5</sub> Pt |
| habit, color                                  | block,<br>colorless                               | block,<br>colorless                               | block, orange                                     | rod, yellow                                       |
| size, mm                                      | 0.36 x 0.23 x<br>0.17                             | 0.25 x 0.24 x<br>0.12                             | 0.28 x 0.12 x<br>0.08                             | 0.50 x 0.10 x<br>0.10                             |
| lattice type                                  | tetragonal                                        | monoclinic                                        | triclinic                                         | monoclinic                                        |
| space group                                   | P4 <sub>1</sub> 2 <sub>1</sub> 2                  | P2 <sub>1</sub> /c                                | P1-                                               | P2 <sub>1</sub> /n                                |
| a, Å                                          | 14.0744(6)                                        | 13.8830(11)                                       | 9.737(7)                                          | 9.1124(6)                                         |
| b, Å                                          | 14.0744(6)                                        | 12.4658(10)                                       | 12.790(10)                                        | 18.6090(13)                                       |
| c, Å                                          | 12.4525(11)                                       | 17.7056(15)                                       | 13.612(10)                                        | 18.2156(14)                                       |
| α, deg                                        | 90                                                | 90                                                | 105.497(12)                                       | 90                                                |
| β, deg                                        | 90                                                | 108.6250(10)                                      | 105.990(12)                                       | 104.4760(10)                                      |
| γ, deg                                        | 90                                                | 90                                                | 109.101(12)                                       | 90                                                |
| V, Å <sup>3</sup>                             | 2466.7(3)                                         | 2903.7(4)                                         | 1415.7(18)                                        | 2990.8(4)                                         |
| Z                                             | 4                                                 | 4                                                 | 2                                                 | 4                                                 |
| formula wt, g mol <sup>-1</sup>               | 556.66                                            | 624.78                                            | 624.78                                            | 646.78                                            |
| D <sub>c</sub> , g cm <sup>-3</sup>           | 1.499                                             | 1.429                                             | 1.466                                             | 1.436                                             |
| Temperature                                   | 173(2)                                            | 223(2)                                            | 173(2)                                            | 173(2)                                            |
| μ, mm <sup>-1</sup>                           | 5.702                                             | 4.853                                             | 4.976                                             | 4.714                                             |
| F (000)                                       | 1112                                              | 1264                                              | 632                                               | 1304                                              |
| θ range, deg                                  | 2.05 to 25.03                                     | 1.55 to 27.53                                     | 1.69 to 25.17                                     | 1.59 to 25.05                                     |
| index ranges                                  | -16 ≤ h ≤ 16,<br>-16 ≤ k ≤ 16,<br>-9 ≤ l ≤ 14     | -18 ≤ h ≤ 15,<br>-15 ≤ k ≤ 16,<br>-21 ≤ l ≤ 23    | -11 ≤ h ≤ 10,<br>-15 ≤ k ≤ 14,<br>0 ≤ l ≤ 16      | -10 ≤ h ≤ 10,<br>-22 ≤ k ≤ 22,<br>-20 ≤ l ≤ 21    |
| reflns collected                              | 13264                                             | 23652                                             | 25251                                             | 25310                                             |
| unique reflns                                 | 2183                                              | 6647                                              | 5037                                              | 5290                                              |
| weighting factors, <sup>a</sup><br>a,b        | 0.0133, 0.0000                                    | 0.0177, 0.0000                                    | 0.1425, 0.0000                                    | 0.0409, 6.2765                                    |
| max, min<br>transmission                      | 1.000, 0.695                                      | 1.000, 0.804                                      | 0.67, 0.216                                       | 1.000, 0.680                                      |
| data/restraints/para<br>meters                | 2183 / 0 / 127                                    | 6647 / 0 / 289                                    | 5037 / 3 / 260                                    | 5290 / 5 / 314                                    |
| R <sub>1</sub> , wR <sub>2</sub> (I > 2σ(I))  | 0.0190, 0.0412                                    | 0.0284, 0.0609                                    | 0.0873, 0.2000                                    | 0.0391, 0.0843                                    |
| R <sub>1</sub> , wR <sub>2</sub> (all data)   | 0.0220, 0.0420                                    | 0.0435, 0.0641                                    | 0.1111, 0.2108                                    | 0.0524, 0.0888                                    |
| goodness-of-fit                               | 1.033                                             | 0.916                                             | 1.017                                             | 1.075                                             |
| largest diff peak,<br>hole, e Å <sup>-3</sup> | 0.269, -0.592                                     | 0.586, -1.636                                     | 5.855, -5.654                                     | 0.640, -2.190                                     |

<sup>a</sup> w = [σ<sup>2</sup>(F<sub>o</sub><sup>2</sup>) + (aP)<sup>2</sup> + (bP)]<sup>-1</sup>, where P = (F<sub>o</sub><sup>2</sup> + 2F<sub>c</sub><sup>2</sup>)/3.

**Table S2.** Bond Lengths (Å) and Angles (Deg) Summary for (TBA)[Pt(CN)<sub>3</sub>(CNCH<sub>3</sub>)] (**1**), (TBA)[Pt(CN)<sub>3</sub>(CN-*c*-C<sub>6</sub>H<sub>11</sub>)] (**2-c**), (TBA)[Pt(CN)<sub>3</sub>(CN-*c*-C<sub>6</sub>H<sub>11</sub>)] (**2-o**), (TBA)[Pt(CN)<sub>3</sub>(CN-*p*-(C<sub>2</sub>H<sub>5</sub>)-C<sub>6</sub>H<sub>4</sub>)] (**3**)

| Compound        | <b>1</b>  | <b>2-c</b> | <b>2-o</b> | <b>3</b> |
|-----------------|-----------|------------|------------|----------|
| Pt(1)-C(1)      | 1.974(5)  | 1.946(4)   | 1.945(16)  | 1.947(6) |
| Pt(1)-C(2)      | 1.994(4)  | 1.998(4)   | 1.972(17)  | 1.995(7) |
| Pt(1)-C(3)      | 1.979(5)  | 1.976(4)   | 1.983(17)  | 1.988(6) |
| Pt(1)-C(4)      | na        | 1.998(4)   | 1.975(17)  | 2.005(7) |
| C(1)-N(1)       | 1.144(6)  | 1.143(5)   | 1.153(19)  | 1.147(7) |
| C(2)-N(2)       | 1.153(5)  | 1.131(4)   | 1.131(19)  | 1.141(8) |
| C(3)-N(3)       | 1.147(5)  | 1.153(5)   | 1.113(19)  | 1.140(8) |
| C(4)-N(4)       | na        | 1.150(4)   | 1.141(19)  | 1.128(8) |
| N(1)-C(5)       | na        | 1.454(5)   | 1.443(19)  | 1.412(7) |
| N(1)-C(4)       | 1.437(6)  | na         | na         | na       |
| C(1)-Pt(1)-C(2) | 92.28(11) | 89.65(15)  | 89.9(6)    | 91.1(2)  |
| C(1)-Pt(1)-C(3) | 180.0     | 175.81(4)  | 177.6(6)   | 179.2(2) |
| C(1)-Pt(1)-C(4) | na        | 92.28(15)  | 91.8(6)    | 90.5(2)  |
| C(2)-Pt(1)-C(3) | 87.72(11) | 87.39(16)  | 91.5(6)    | 89.6(2)  |
| C(2)-Pt(1)-C(4) | na        | 177.50(14) | 177.7(6)   | 178.3(2) |
| C(3)-Pt(1)-C(4) | na        | 90.60(16)  | 86.9(6)    | 88.8(2)  |
| Pt(1)-C(1)-N(1) | 180.0(4)  | 174.9(3)   | 176.1(13)  | 178.4(5) |
| Pt(1)-C(2)-N(2) | 176.1(4)  | 178.0(4)   | 177.1(13)  | 179.7(7) |
| Pt(1)-C(3)-N(3) | 180.0(4)  | 175.3(4)   | 176.2(14)  | 179.6(6) |
| Pt(1)-C(4)-N(4) | na        | 177.9(3)   | 177.8(15)  | 178.1(7) |
| C(1)-N(1)-C(5)  | na        | 170.9(4)   | 175.5(14)  | 178.1(6) |
| C(1)-N(1)-C(4)  | 180.0(4)  | na         | na         | na       |

na = not applicable

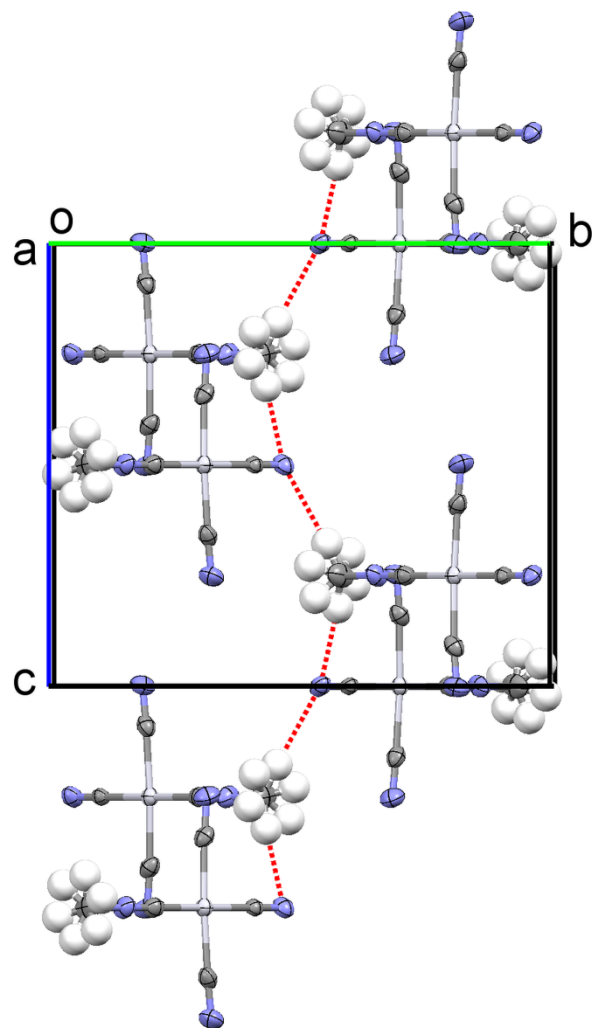

**Fig. S1.** Intermolecular Interactions in the Structure of **1**. Two positions of the methyl hydrogens are shown as a 2-fold axis is coincident with the C2-N1-C1-Pt1-C4-N3 vector.

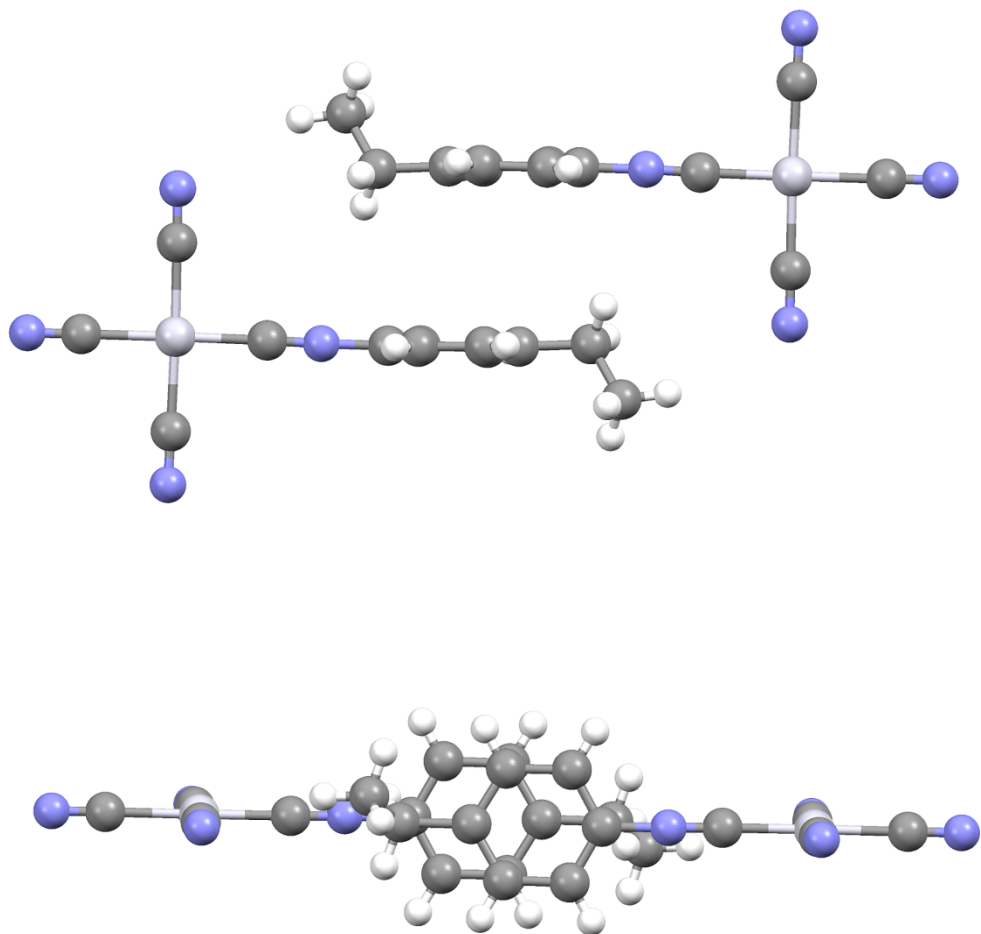

**Fig. S2.** Intermolecular Interactions in the Structure of **3**.  $\pi$ - $\pi$  stacking view perpendicular to dimer stacking interaction vector (above) and parallel view to dimer stacking interaction vector (below).

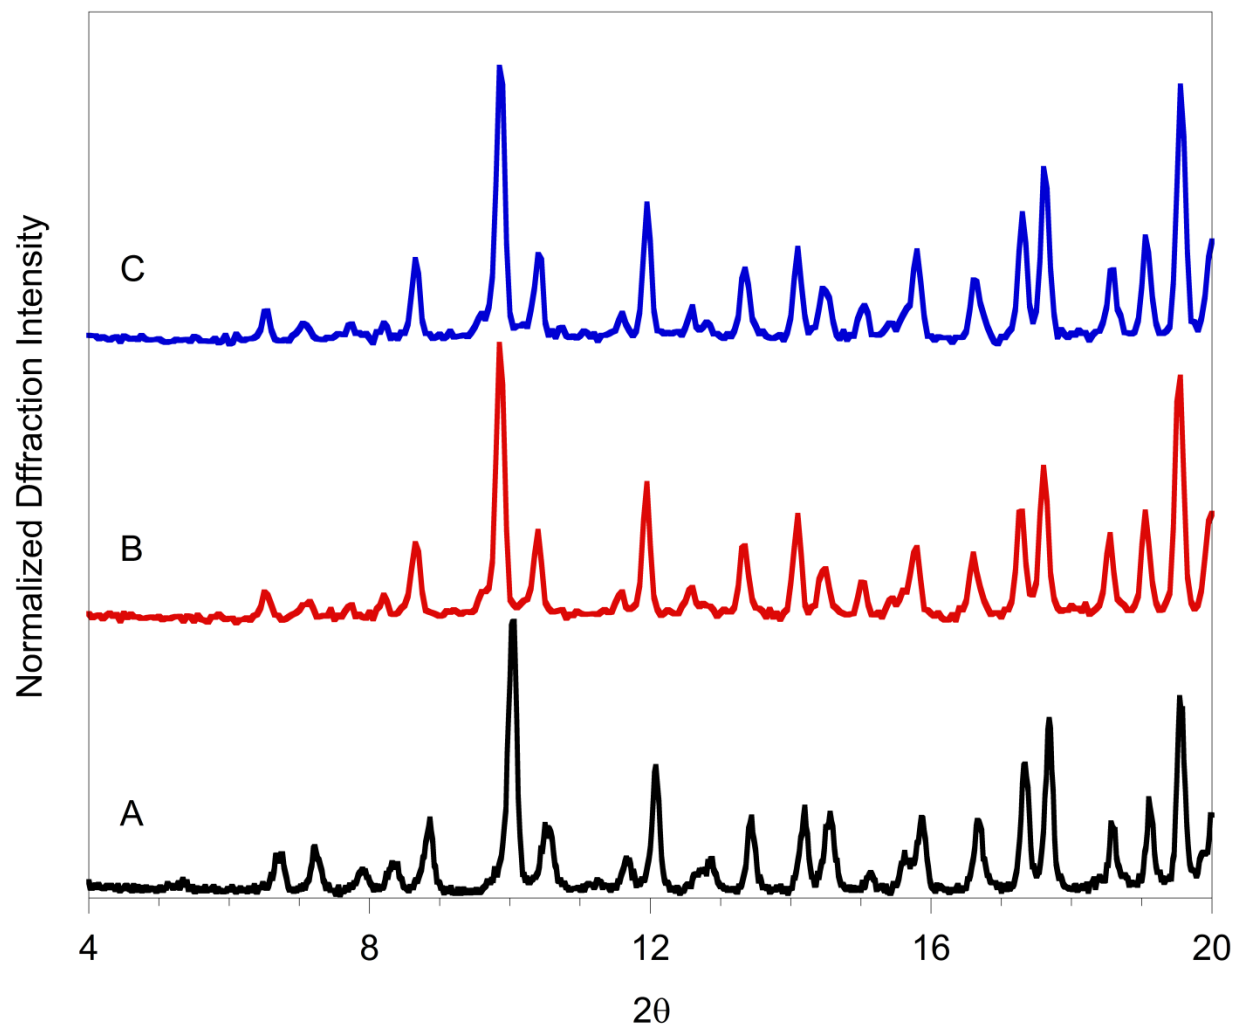

**Fig. S3.** Powder X-ray Diffraction of **2** at room temperature (20°C) (A, black), -150°C (B, red), and -190°C (C, blue)

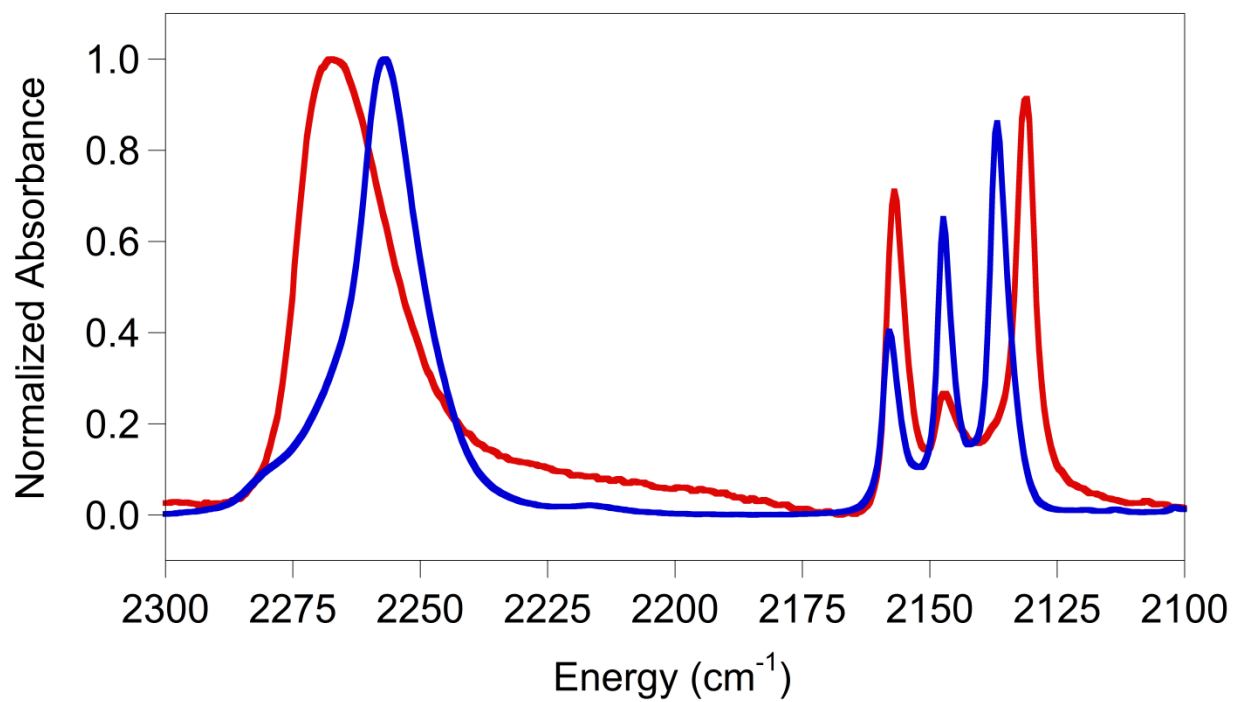

**Fig. S4.** Normalized ATR-IR Spectra of **1** (blue) and **4** (red).

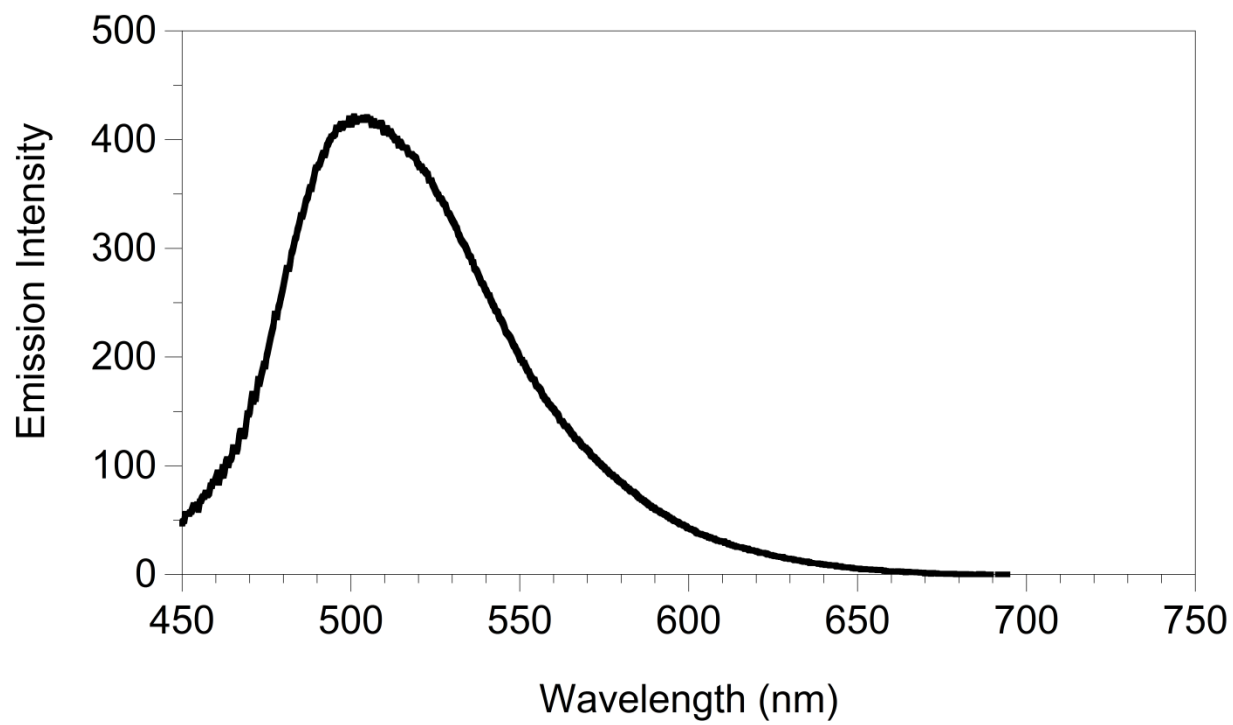

**Fig. S5.** Uncorrected Solid-state Emission Spectrum of a Film of **1**.



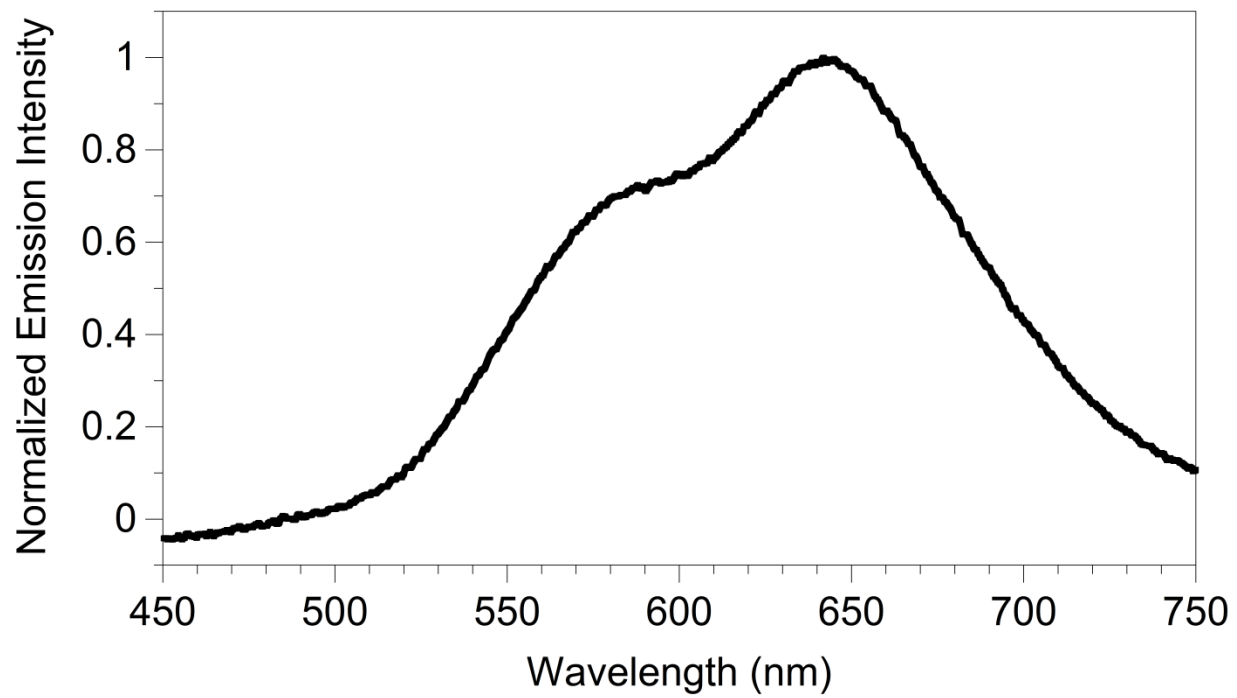

**Fig. S6.** Uncorrected Normalized Solid-state Emission Spectrum of Crystalline **3**

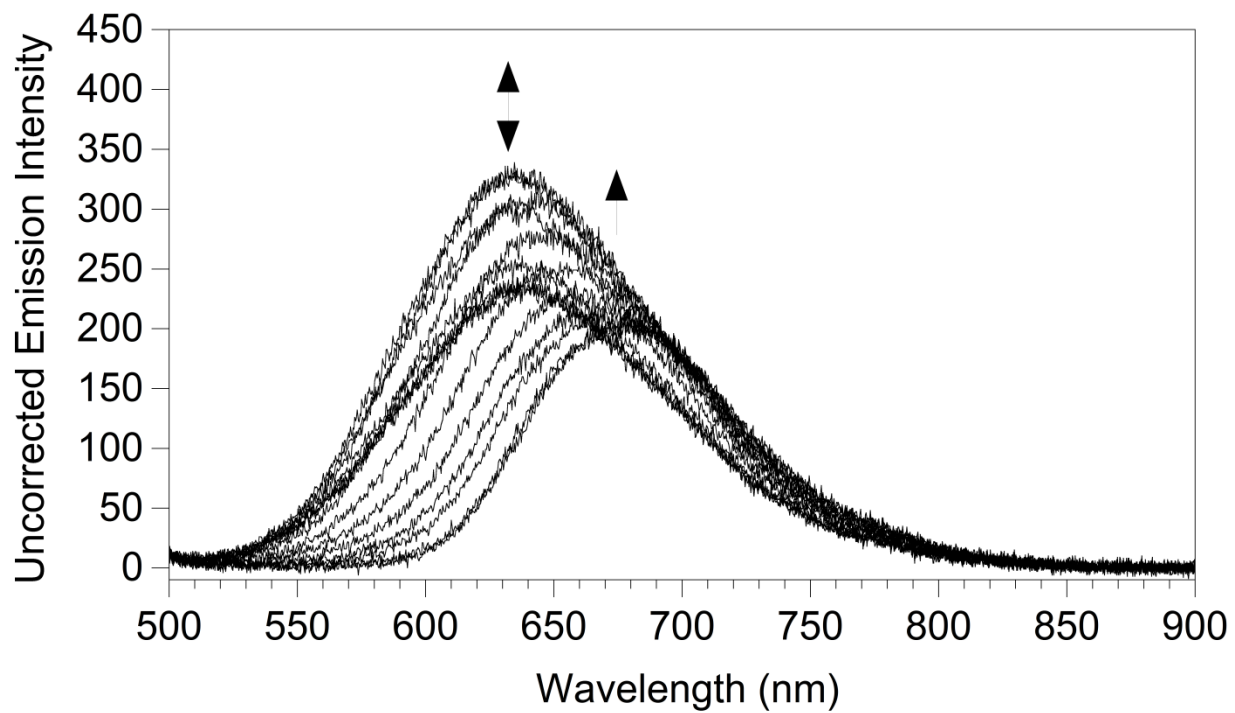

**Fig. S7.** Uncorrected Solid-state Emission Spectra of 4 Exposed to Water Vapor.

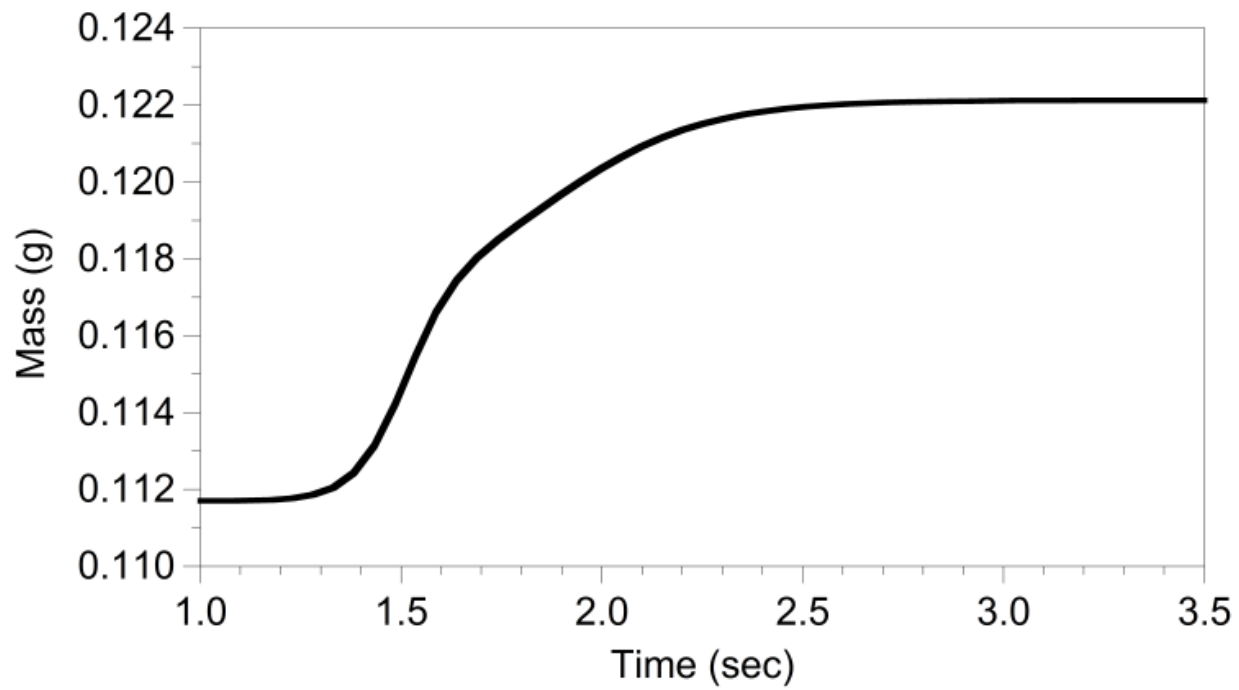

**Fig. S8** Simulated mass pickup of 4 by water based on the concentration profiles calculated from PCA analysis.
